# Supplementary material for: Association between DNA methylation and ADHD symptoms from birth to school age: a prospective meta-analysis
Source: PubMed Central journal article supplement (PMC7665047; doi:10.1038/s41398-020-01058-z), 2020-11-12
Supplement: 41398_2020_1058_MOESM5_ESM.pdf [file 41398_2020_1058_MOESM5_ESM.pdf]

## Supplementary Tables

Table S2: Phenotype Characteristics

| Study Name | Ancestry/<br>Ethnicity | Instrument | EWAS                 | Assesment age<br>(mean years) | Age (SD) | Total ADHD<br>score (mean) | Total ADHD<br>score (SD) | % Girls |
|------------|------------------------|------------|----------------------|-------------------------------|----------|----------------------------|--------------------------|---------|
| ALSPAC     | European               | DAWBA      | Birth and school-age | 7.5                           | 0.9      | 0.5                        | 0.9                      | 52      |
| ALSPAC     | European               | DAWBA      | Birth                | 10.7                          | 0.1      | 0.5                        | 0.9                      | 51      |
| ALSPAC     | European               | DAWBA      | Birth                | 13.9                          | 0.1      | 0.5                        | 0.9                      | 50      |
| ALSPAC     | European               | DAWBA      | Birth                | 15.4                          | 0.2      | 0.5                        | 0.9                      | 51      |
| GENR       | European               | CBCL 1.5-5 | Birth and school-age | 5.9                           | 0.3      | 2.7                        | 2.4                      | 51      |
| GENR       | European               | Conners    | Birth                | 8.1                           | 0.2      | 7.5                        | 6.6                      | 51      |
| GENR       | European               | CBCL 6-18  | Birth                | 9.7                           | 0.3      | 2.6                        | 2.8                      | 51      |
| GLAKU      | European               | CBCL       | School age           | 12.3                          | 0.5      | 1.9                        | 2.4                      | 54.6    |
| HELIX      | European               | Conners    | School-age           | 8.0                           | 1.6      | 7.8                        | 6.6                      | 44.7    |
| HELIX      | Pakistani              | Conners    | School-age           | 6.6                           | 0.2      | 6.7                        | 6.9                      | 44.3    |
| INMA       | European               | Conners    | Birth                | 6.7                           | 0.4      | 7.7                        | 6.9                      | 52      |
| INMA       | European               | CBCL 6-18  | Birth                | 8.9                           | 0.6      | 3.4                        | 3.1                      | 48      |
| NEST       | Black                  | BASC       | Birth                | 4.8                           | 0.5      | 15.8                       | 5.4                      | 46      |
| NEST       | White                  | BASC       | Birth                | 5.0                           | 0.6      | 15.6                       | 6.5                      | 49      |
| PREDO      | European               | Conners    | Birth                | 4.5                           | 0.5      | 5.0                        | 4.4                      | 47.1    |

Table S3: Twin heritability of genome-wide significant CpG sites

| CpG        | A    | C    | E    |
|------------|------|------|------|
| cg01271805 | 0.19 | 0.10 | 0.71 |
| cg09158638 | 0.00 | 0.06 | 0.94 |
| cg09762907 | 0.02 | 0.09 | 0.89 |
| cg11251614 | 0.00 | 0.07 | 0.93 |
| cg17876201 | 0.00 | 0.09 | 0.91 |
| cg21600027 | 0.00 | 0.04 | 0.96 |
| cg22997238 | 0.00 | 0.25 | 0.75 |
| cg24838839 | 0.15 | 0.00 | 0.85 |
| cg25520701 | 0.00 | 0.11 | 0.89 |

Based on Hannon E, Knox O, Sugden K, Burrage J, Wong CCY, Belsky DW *et al.* Characterizing genetic and environmental influences on variable DNA methylation using monozygotic and dizygotic twins. *PLoS Genet* 2018; **14**: 1–27.

Table S4: EWAS Results for birth methylation in children with European ancestry

| CpG        | Gene       | Chr | Position  | Birth methylation    |      |       |      |          |
|------------|------------|-----|-----------|----------------------|------|-------|------|----------|
|            |            |     |           | n <sub>studies</sub> | n    | B     | SE   | p        |
| cg25520701 | CREB5      | 7   | 28800657  | 5                    | 2394 | -3.54 | 0.60 | 4.77E-09 |
| cg17876201 | ZBTB38     | 3   | 141139991 | 5                    | 2401 | -4.45 | 1.27 | 6.75E-09 |
| cg09158638 | Intergenic | 16  | 62309996  | 5                    | 2414 | -3.06 | 1.28 | 1.08E-08 |
| cg21600027 | Intergenic | 4   | 124443502 | 5                    | 2409 | -3.10 | 0.84 | 1.90E-08 |
| cg11251614 | PPIL1      | 6   | 36839846  | 5                    | 2395 | -3.52 | 0.62 | 1.94E-08 |
| cg01271805 | ERC2       | 3   | 55694954  | 5                    | 2413 | -3.29 | 1.70 | 3.13E-08 |
| cg24838839 | Intergenic | 5   | 61031569  | 5                    | 2412 | -4.06 | 1.88 | 4.10E-08 |
| cg22997238 | Intergenic | 7   | 36014218  | 5                    | 2410 | -1.64 | 0.30 | 8.04E-08 |
| cg10025904 | LRRRC8B    | 1   | 89996331  | 5                    | 2416 | -2.74 | 0.59 | 9.76E-08 |
| cg09762907 | TRERF1     | 6   | 42290256  | 5                    | 2404 | -2.10 | 0.39 | 1.05E-07 |

**Chr** Chromosome

**n<sub>studies</sub>** Number of studies

**n** Number of participants

**B** Regression coefficient

**SE** Standard error

Table S5: DNA methylation at top CpG sites regressed on prenatal stress

| CpG        | Gene       | Chr | Position  | Prenatal Stress      |      |       |      |      |
|------------|------------|-----|-----------|----------------------|------|-------|------|------|
|            |            |     |           | n <sub>studies</sub> | n    | B     | SE   | p    |
| cg25520701 | CREB5      | 7   | 28800657  | 1                    | 1214 | -0.18 | 0.85 | 0.84 |
| cg17876201 | ZBTB38     | 3   | 141139991 | 1                    | 1214 | -0.28 | 0.62 | 0.65 |
| cg09158638 | Intergenic | 16  | 62309996  | 1                    | 1214 | -0.60 | 0.77 | 0.44 |
| cg21600027 | Intergenic | 4   | 124443502 | 1                    | 1214 | -0.25 | 0.78 | 0.75 |
| cg11251614 | PPIL1      | 6   | 36839846  | 1                    | 1214 | -0.41 | 0.72 | 0.57 |
| cg01271805 | ERC2       | 3   | 55694954  | 1                    | 1214 | 0.39  | 0.89 | 0.66 |
| cg24838839 | Intergenic | 5   | 61031569  | 1                    | 1214 | -0.39 | 0.62 | 0.53 |
| cg22997238 | Intergenic | 7   | 36014218  | 1                    | 1214 | -0.16 | 1.80 | 0.38 |
| cg09762907 | TRERF1     | 6   | 42290256  | 1                    | 1214 | -1.26 | 1.14 | 0.27 |

**Chr** Chromosome

**n<sub>studies</sub>** Number of studies

**n** Number of participants

**B** Regression coefficient

**SE** Standard error

Table S6: Replication of Walton et al. EWAS (ADHD trajectories and cord blood methylation)

| CpG        | Gene    | Chr | Position  | Discovery            |     |       |         | Replication          |      |       |      |      |
|------------|---------|-----|-----------|----------------------|-----|-------|---------|----------------------|------|-------|------|------|
|            |         |     |           | n <sub>studies</sub> | n   | B     | p       | n <sub>studies</sub> | n    | B     | SE   | p    |
| cg18587973 | CDADC1  | 13  | 49822535  | 1                    | 817 | 0.17  | 1.2E-06 | 5                    | 1755 | 3.54  | 1.55 | 0.03 |
| cg27469152 | EPX     | 17  | 56282313  | 1                    | 817 | -0.18 | 2.0E-07 | 5                    | 1763 | -1.20 | 0.85 | 0.20 |
| cg16290904 | PEX2    | 8   | 77912348  | 1                    | 817 | 0.17  | 7.4E-07 | 5                    | 1761 | -2.99 | 2.60 | 0.23 |
| cg03905179 | MAFK    | 7   | 1582588   | 1                    | 817 | 0.17  | 1.3E-06 | 5                    | 1756 | 0.70  | 1.67 | 0.46 |
| cg24843380 | ZNF454  | 5   | 178367827 | 1                    | 817 | 0.17  | 1.6E-06 | 5                    | 1762 | -1.73 | 2.05 | 0.47 |
| cg05653018 | ELF3    | 1   | 201979533 | 1                    | 817 | 0.17  | 1.4E-06 | 5                    | 1763 | 0.45  | 0.60 | 0.53 |
| cg15096815 | JUN     | 1   | 59249838  | 1                    | 817 | -0.18 | 3.5E-07 | 5                    | 1763 | 0.55  | 1.08 | 0.68 |
| cg24481594 | SKI     | 1   | 2190850   | 1                    | 817 | -0.20 | 1.5E-08 | 5                    | 1763 | -0.42 | 1.08 | 0.76 |
| cg26263766 | ZNF544  | 19  | 58739734  | 1                    | 817 | 0.17  | 8.7E-07 | 5                    | 1714 | -0.31 | 1.13 | 0.84 |
| cg01324543 | CCDC30  | 1   | 42999439  | 1                    | 817 | -0.17 | 7.2E-07 | 5                    | 1763 | 0.59  | 1.75 | 0.92 |
| cg13714586 | FBXW5   | 9   | 139838358 | 1                    | 817 | 0.17  | 1.3E-06 | 5                    | 1752 | 0.72  | 4.50 | 0.93 |
| cg09989037 | ST3GAL3 | 1   | 44300942  | 1                    | 817 | -0.17 | 9.5E-07 | 5                    | 1763 | -0.17 | 0.56 | 0.96 |
| cg22193912 | MAFG    | 17  | 79881523  | 1                    | 817 | 0.17  | 1.3E-06 | 5                    | 1763 | 0.24  | 0.81 | 0.99 |

**Chr** Chromosome

**n<sub>studies</sub>** Number of studies

**n** Number of participants

**B** Regression coefficient

**SE** Standard error

Table S7: Replication of Wilmot et al. EWAS (case-control study in school-age)

| CpG        | Gene  | Chr | Position  | Discovery            |    |       |      | Replication          |      |       |      |      |
|------------|-------|-----|-----------|----------------------|----|-------|------|----------------------|------|-------|------|------|
|            |       |     |           | n <sub>studies</sub> | n  | Diff. | p    | n <sub>studies</sub> | n    | B     | SE   | p    |
| cg05180887 | MYT1L | 2   | 1817263   | 1                    | 92 | -0.05 | 0.04 | 4                    | 2080 | -0.18 | 0.20 | 0.43 |
| cg08479516 | VIPR2 | 7   | 158905536 | 1                    | 92 | -0.03 | 0.03 | 4                    | 1900 | 0.04  | 0.52 | 0.57 |
| cg06201514 | MYT1L | 2   | 1817409   | 1                    | 92 | -0.08 | 0.02 | 5                    | 2295 | -0.06 | 0.11 | 0.66 |
| cg13444538 | VIPR2 | 7   | 158905317 | 1                    | 92 | -0.06 | 0.03 | 4                    | 2080 | -0.06 | 0.23 | 0.74 |
| cg10075506 | MYT1L | 2   | 1817351   | 1                    | 92 | -0.08 | 0.04 | 5                    | 2295 | -0.02 | 0.12 | 0.88 |
| cg05554000 | VIPR2 | 7   | 158905015 | 1                    | 92 | -0.05 | 0.02 | 5                    | 2295 | -0.02 | 0.16 | 0.92 |

**Chr** Chromosome

**n<sub>studies</sub>** Number of studies

**n** Number of participants

**Dff.** Difference in methylation between cases and controls (Negative values indicate hypomethylation in controls)

**B** Regression coefficient

**SE** Standard error
